# Supplementary material for: Chromosomal analysis and short-term outcome of prenatally diagnosed complex congenital heart disease
Source: Research Square preprint supplement (doi:10.21203/rs.3.rs-5038076/v1), 2024-10-10
Supplement: Supplementary file 1 [file 20d952c457d5d564449141d4.docx]

**Supplementary data**

List of abbreviations:

AA aortic valve atresia

AS aortic valve stenosis

ASD atrial septal defect

AVB atrioventricular block

AVSD atrioventricular septal defect

CHD congenital heart disease

CMA chromosomal microarray

CoA aortic coarctation

DCM dilated cardiomyopathy

DORV double outlet right ventricle

d-TGA dextro - transposition of the great arteries

EFE endocardial fibro-elastosis

HCM hypertrophic cardiomyopathy

HLHS hypoplastic left heart syndrome

ICSI intracytoplasmic sperm-injection

IVF in vitro fertilization

KCA pediatric cardiology

li VCS left vena cava superior

L-TGA levo - transposition of the great arteries

LVOTO left ventricular outflow tract obstruction

LVNC left ventricular noncompaction

MA mitral valve atresia

MS mitral valve stenosis

NGS next generation sequencing

NIPS noninvasive prenatal screening

NS-CHD non-syndromic congenital heart disease

PA pulmonary valve atresia

PAPVR/PAPVU partial abnormal pulmonary venous return

PMA postmenstrual age

PS pulmonary valve stenosis

RAA right turning aortic arch

RV right ventricle

RVTO right ventricular outflow tract obstruction

S-CHD syndromic congenital heart disease

SUA single umbilical artery

SVT supraventricular tachycardia

TA tricuspid valve atresia

TAPVR/TAPVU total abnormal pulmonary venous return

TOF tetralogy of Fallot

TS tricuspid valve stenosis

VSD ventricular septal defect

VUS variant of unknown significance

WES whole exome sequencing

WGS whole genome sequencing

WPW Wolff-Parkinson-White

**Supplementary Fig. 1. Flowchart exclusion and outcome fetal files**

**
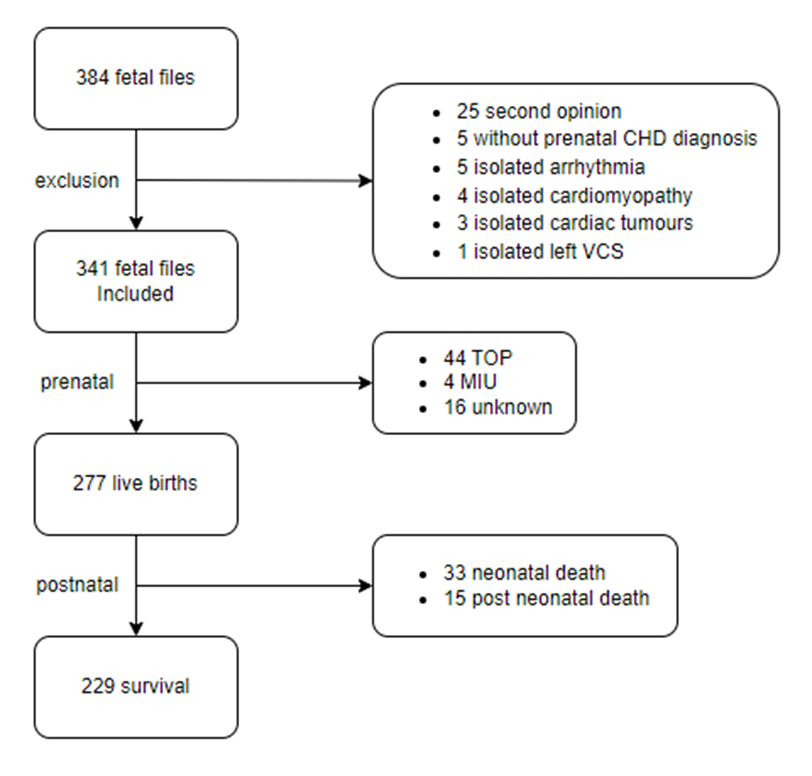
**

**Supplementary Fig. 2. Maternal age at the time of CHD diagnosis.** The average maternal age at the time of CHD diagnosis was 30.93 years (range 18-44).

**
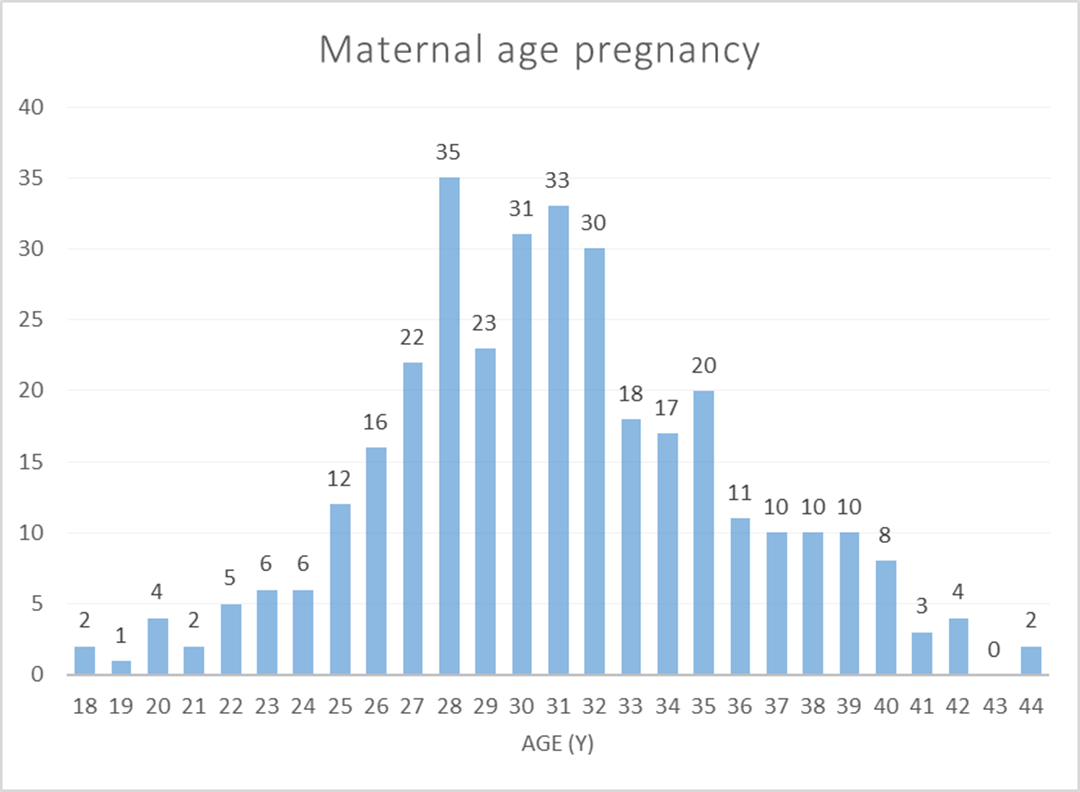
**

**Supplementary Fig. 3. Gravidity of the pregnancy that was complicated by prenatally diagnosed CHD.** The majority of pregnancies involved G1 (N=96) and G2 (N=98) pregnancies.

**
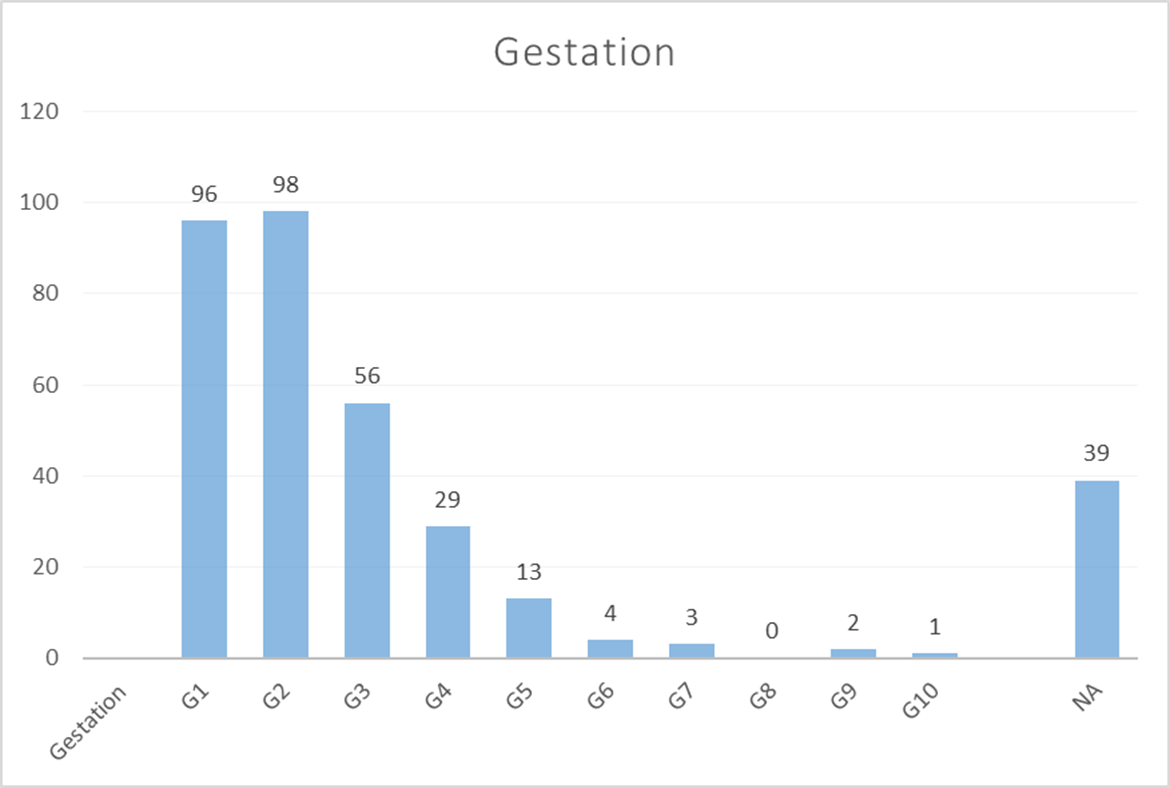
**

**Supplementary Fig. 4. Postmenstrual age at CHD diagnosis.** The average postmenstrual age (PMA) at CHD diagnosis at our center was 25.29 weeks. Most diagnoses were made between PMA week 20-23 (corresponding to CHD diagnosis by second trimester ultrasound), at week 30-31 (corresponding to CHD diagnosis by third trimester ultrasound), or at week 36 (corresponding to routine ultrasound at 35-37 weeks PMA).

**
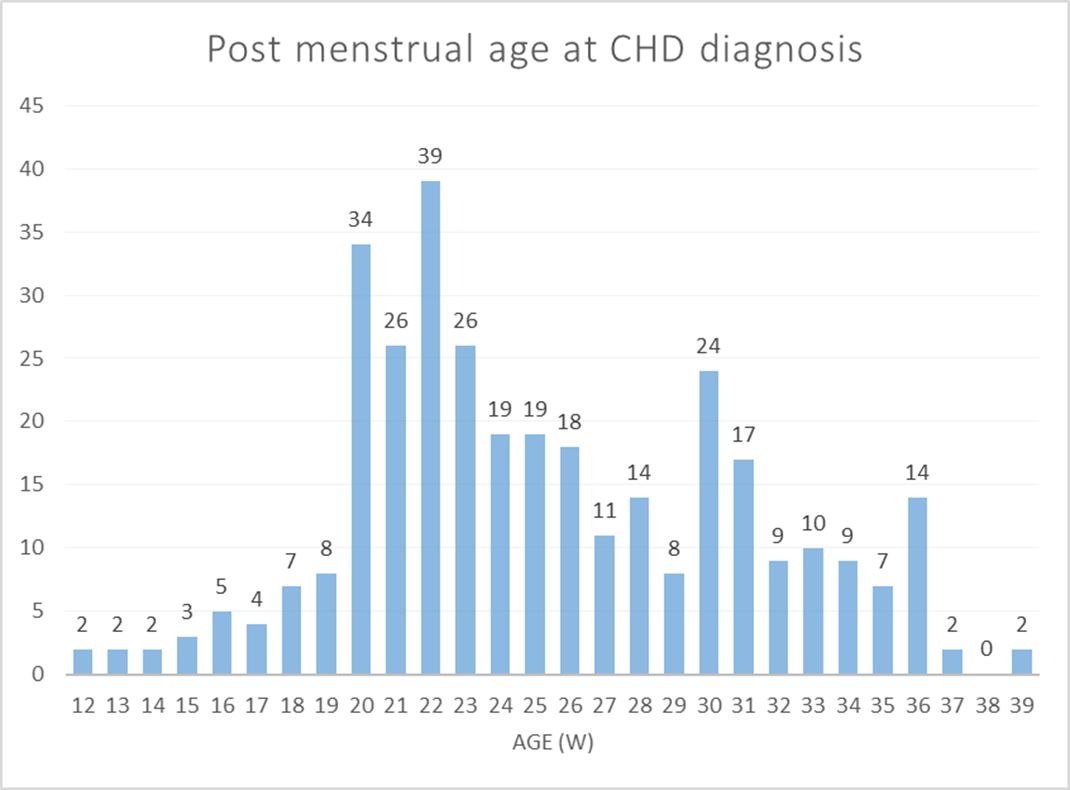
**

| **CHD severity scores** | **Risk** | **Definition** | **examples** |
| --- | --- | --- | --- |
| **score A** | very high | CHD associated with severe life threatening extracardiac anomalies  or with a prenataly diagnosed genetic disorder that has a unfavorable prognosis (lethal or severe developmental disorder). | diaphragmatic hernia, tracheal atresia, bilateral renal dysplasia/agenesis, bilateral lung hypoplasia, severe skeletal dysplasie, severe neural tube defect, anencephaly etc. |
| **score B** | high | Isolated CHD with high mortality preoperatieve, peroperative or postoperative and/or need for multipele surgical corrections with a severe impact on the quality of life. | HLH,  truncus arteriosus, complex TGA, PA, TOF with PA, severe AS, DORV, MA/TA, Ebstein anomaly, TAPVR, isomerism, DCM/HCM/LVNC, LV aneurysma, ectopia cordis etc. |
| **score C** | moderate | CHD with variable prognosis after surgery | Isolated TGA, TOF, CoA, AVSD, PAPVR etc. |
| **score D** | Low | CHD with favorable prognosis after surgery or spontanous recovery | VSD, TI, situs inversus totalis, left VCS etc. |

**Supplementary Table 1.** Classification of CHD severity in accordance with scores provided by Gowda et al. (27)

| **Pat** | **definitive CHD diagnosis** | **pathogenic variant** | **hg38 coordinates** | **inheritance** | **analysis** | **prenatal**  **NS/S** | **postnatal NS/S** | **prenatal outcome** | **postnatal outcome** |
| --- | --- | --- | --- | --- | --- | --- | --- | --- | --- |
| 1 | TOF | 15q11.2 deletion | 15:22554982-23110497 | paternal | CMA postnatal | NS | NS | live birth | survival |
| 2 | LVOTO | 19p13.2 duplication (NFIX) | 19:12633946-13159769 | de novo | CMA postnatal | S | S | live birth | survival |
| 3 | d-TGA | 1q21.1q21.2 deletion BP3-BP4 | 1:147105904-147917509 | de novo | CMA postnatal | NS | S | live birth | survival |
| 4 | UVH MS DORV | 22q11.2 deletion LCR22 A-D | 22:18902649-21457728 | de novo | CMA postnatal | S | S | live birth | †7 days |
| 5 | RAA | 22q11.2 deletion LCR22 A-D | 22:18902649-21103321 | de novo | CMA postnatal | NS | S | live birth | survival |
| 6 | TOF | 22q11.2 deletion LCR22 A-D | 22:18902649-21103321 | de novo | CMA postnatal | NS | S | live birth | survival |
| 7 | TOF DORV | 22q11.2 deletion LCR22 A-D | 22:18890274-21108064 | de novo | CMA postnatal | S | S | live birth | survival |
| 8 | LVOTO | 7q11.23 deletion (Williams-Beuren) | 7:73307413-74725194 | de novo | CMA postnatal | S | S | live birth | survival |
| 9 | LVOTO | 9p22.2p13.1 duplication (mos 40%) | 9:17571119-38994055 | de novo | CMA postnatal | NS | NS | live birth | survival |
| 10 | TOF | monosomy X (mos 30%) | mosaic 45,X/46,XX | de novo | CMA postnatal | S | S | MIU | MIU |
| 11 | AVSD | trisomy 21 | T21 | de novo | CMA postnatal | NA | NA | live birth | survival |
| 12 | VSD, AS, HAA | trisomy 22 | T22 | de novo | CMA postnatal | S | S | live birth | †7 days |
| 13 | UVH HAA AVSD | 16q24.1 deletion (FOXF1) | 16:85800946-86902948 | de novo | CMA prenatal | NS | NA | TOP | TOP |
| 14 | TOF PA MAPCA | 17q22q23.3 deletion | 17:58901128-63487563 | de novo | CMA prenatal | S | S | live birth | †1 day |
| 15 | VSD | 20p12.3 deletion (BMP2) | 20:6336604-8078349 | maternal | CMA prenatal | S | S | live birth | survival |
| 16 | TOF RAA | 22q11.2 deletion LCR22 A-D | 22:18907307-21114122 | de novo | CMA prenatal | S | S | live birth | survival |
| 17 | UVH TA VSD PS | 22q11.2 deletion LCR22 A-D | 22:18860448-21186058 | de novo | CMA prenatal | NS | S | live birth | survival |
| 18 | RAA | 22q11.2 deletion LCR22 A-D | 22:18907307-21103321 | de novo | CMA prenatal | S | S | TOP | TOP |
| 19 | IAA VSD | 22q11.2 deletion LCR22 A-D | 22:18902649-21186058 | de novo | CMA prenatal | S | S | TOP | TOP |
| 20 | VSD subAS HAA | 22q11.2 deletion LCR22 A-D | 22:18907307-21103321 | de novo | CMA prenatal | S | S | live birth | survival |
| 21 | IAA VSD BAV | 22q11.2 deletion LCR22 A-D | 22:18902649-21103321 | de novo | CMA prenatal | S | S | live birth | survival |
| 22 | VSD LVOTO | 5p15.33p13.2 deletion (cri-du-chat) | 5:22149-34929002 | de novo | CMA prenatal | S | S | TOP | TOP |
| 23 | AVSD HLH | 8p23.3 deletion; Xq27.3q28 dup (unbalanced translocation) | 8:241605-10867240;  X:147720631-155952524 | de novo | CMA prenatal | NS | S | TOP | TOP |
| 24 | TOF PA | 8q21.1q13.2 deletion; 13q21.33 deletion | 8:56835076-68175800;  13:69345468-72594686 | de novo | CMA prenatal | S | S | TOP | TOP |
| 25 | LVOTO | monosomy X | 45,X | de novo | CMA prenatal | S | S | live birth | survival |
| 26 | AVSD | trisomy 18 | T18 | de novo | CMA prenatal | S | S | TOP | TOP |
| 27 | AVSD | trisomy 21 | T21 | de novo | CMA prenatal | S | S | TOP | TOP |
| 28 | HAA, left VCS | trisomy 21 | T21 | de novo | CMA prenatal | NS | S | TOP | TOP |
| 29 | Ebstein VSD | trisomy 21 | T21 | de novo | CMA prenatal | S | S | TOP | TOP |
| 30 | AVSD | trisomy 21 mosaicism (71%) | mosaic T21 | de novo | CMA prenatal | NS | S | live birth | survival |
| 31 | VSD LVOTO | 22q11.2 deletion LCR22 A-D | 22:18907307-21103321 | de novo | NIPS | S | S | TOP | TOP |
| 32 | AVSD, HLHS | trisomy 18 | T18 | de novo | NIPS | S | S | TOP | TOP |
| 33 | AVSD | trisomy 21 | T21 | de novo | NIPS | NS | S | live birth | survival |
| 34 | asymmetric 4 chamber view | Coffin-Siris syndrome | NM_001128849.1(SMARCA4):c.2653C>T(p.Arg885Cys) | de novo | NGS post-TOP | S | S | TOP | TOP |
| 35 | HAA CoAo | Alveolar capillary dysplasia with misalignment of pulmonary veins | NM_001451.2(FOXF1):c.186_196del (p.Gln62Hisfs*229) | de novo | NGS postnatal | S | S | live birth | †1 day |
| 36 | TOF | Arboleda-Tham syndrome | NM_006766.4(KAT6A):c.3034C>T (p.Arg1012*) | de novo | NGS postnatal | S | S | live birth | survival |
| 37 | LVOTO CoAo | Zhu-Tokita-Takenouchi-Kim (ZTTK) syndrome | NM_032195.2(SON):c.321_324delGTCA (p.Ser108Argfs*40) | de novo | NGS postnatal | S | S | live birth | survival |
| 38 | DORV AS | Kabuki syndrome | NM_003482.3(KMT2D):c.6448delG (p.Val2150Cysfs*114) | de novo | NGS postnatal | S | S | live birth | †2 weeks |
| 39 | LVOTO | Kabuki syndrome | NM_003482.3(KMT2D):c.8047-7T>A | de novo | NGS postnatal | S | S | live birth | †2 mo |
| 40 | AVSD | Noonan syndrome | NM_002880.4(RAF1):c.770C>T (p.Ser257Leu) | de novo | NGS postnatal | S | S | live birth | †9 days |
| 41 | UVH PA TA | Short-rib thoracic dysplasia | NM_001080463.1(DYNC2H1):c.7382G>T (p.Gly2461Val), hom | maternal and paternal | NGS postnatal | S | S | live birth | †7 days |
| 42 | DORV | Noonan syndrome | NM_002834.4(PTPN11):c.5C>T (p.Thr2Ile) | de novo | NGS postnatal | NS | S | live birth | survival |
| 43 | TOF | Hyperpheynlalaninemia** | NM_000277.3(PAH):c.143T>C (p.Leu48Ser); c.442-5C>G | maternal and paternal | NGS postnatal | NS | S | live birth | survival |
| 44 | TOF | CAKUTHED | NM_002585.4(PBX1):c.415dupG (p.Ala139Glyfs*60) | de novo | NGS postnatal | NS | S | live birth | survival |
| 45 | TOF HAA LVH RVH | Noonan syndrome | NM_006912.6(RIT1):c.268A>G (p.Met90Val) | de novo | NGS prenatal | S | S | live birth | survival |

**Supplementary table 3.** Pathogenic chromosomal or single nucleotide variants, including inheritance, CHD diagnosis, pre- and postnatal ECA status and outcomes. **this genetic disorder is not associated with a higher risk of CHD. The genetic cause CHD in patient 43 was unknown. Abbreviations: AS: aortic stenosis; AVSD: atrioventricular septal defect; CoAo: aortic coarctation; DORV: double outlet right ventricle; d-TGA: dextro transposition of the great arteries; HAA: hypoplastic aortic arch; HLHS: hypoplastic left heart syndrome; hom: homozygous; IAA: interrupted aortic arch; LVOTO: left ventricle outflow tract obstruction; MAPCA: major aortopulmonary collateral arteries; MIU: mors in utero (fetal death); mo: months; MS: mitral valve stenosis; NGS: next generation sequencing (whole exome sequencing or targeted gene panel); NIPS: non-invasive prenatal aneuploidy screening; NS: non-syndromic CHD; PA: pulmonary atresia; PS: pulmonary valve stenosis; RAA: right aortic arch; S-CHD: syndromic CHD ; TA: tricuspid atresia; TOF: tetralogy of Fallot; TOP: termination of pregnancy; VCS: superior caval vein; VSD: ventricular septal defect; UVH: univentricular heart.

|  | Pathogenic chromosomal variant | % | Pathogenic chromosomal or SNV | % | total number in prenatal CHD cohort |
| --- | --- | --- | --- | --- | --- |
| LVOTO | 10 | 15.6% | 13 | 20.3% | 64 |
| conotruncal | 7 | 6% | 11 | 9.6% | 115 |
| septal | 6 | 16.7% | 7 | 19.4% | 36 |
| right-sided | 1 | 3% | 3 | 9.7% | 31 |
| UVH | 3 | 7.7% | 4 | 10.3% | 39 |
| Other:  - RAA  - asymmetric 4 chambers | 3  2  1 | 9.6% | 4  2  2 | 12.9% | 31 |
| Total | 30 |  | 42 |  |  |

**Supplementary table 2.** The number and percentage of pathogenic chromosomal and/or single nucleotide

Variants (excluding abnormal NIPS results) per CHD category, corrected for the number of fetuses per CHD

category (%). CHD categories without pathogenic CNVs or SNVs are not depicted. Abbreviations:

LVOTO: left ventricle outflow tract obstruction; RAA: right aortic arch; SNV: single nucleotide variant;

UVH: univentricular heart
